# Supplementary material for: Mixed-metal clusters with a {Re3Mo3Se8} core: from a polymeric solid to soluble species with multiple redox transitions
Source: Royal Society of Chemistry journal article supplement (doi:10.1039/c7dt03571c), 2018-01-01
Supplement: c7dt03571c1.pdf [file c7dt03571c1.pdf]

## Electronic Supplementary Information

### **Mixed-metal clusters with {Re<sub>3</sub>Mo<sub>3</sub>Se<sub>8</sub>} core: from polymeric solid to soluble species with multiple redox transitions**

Viktoriya K. Muravieva,<sup>[a, b]</sup> Yakov M. Gayfulin,<sup>[a]</sup> Maxim R. Ryzhikov,<sup>[a, c]</sup> Igor N. Novozhilov,<sup>[a]</sup>  
Denis G. Samsonenko,<sup>[a, c]</sup> Dmitry A. Piryazev,<sup>[a, c]</sup> Vadim V. Yanshole,<sup>[c, d]</sup> Nikolay G. Naumov\*<sup>[a, c]</sup>

<sup>[a]</sup> Nikolaev Institute of Inorganic Chemistry SB RAS, 3, Acad. Lavrentiev ave., Novosibirsk, 630090 (Russia);

E-mail: [naumov@niic.nsc.ru](mailto:naumov@niic.nsc.ru)

<sup>[b]</sup> Institut des Sciences Chimiques de Rennes, Université de Rennes 1, UMR 6226 UR1-CNRS, Campus de Beaulieu, Rennes, 35042 (France);

<sup>[c]</sup> Novosibirsk State University, 2, Pirogova str., Novosibirsk, 630090 (Russia)

<sup>[d]</sup> International Tomography Center SB RAS, 3A, Institutskaya str., Novosibirsk, 630090 (Russia)

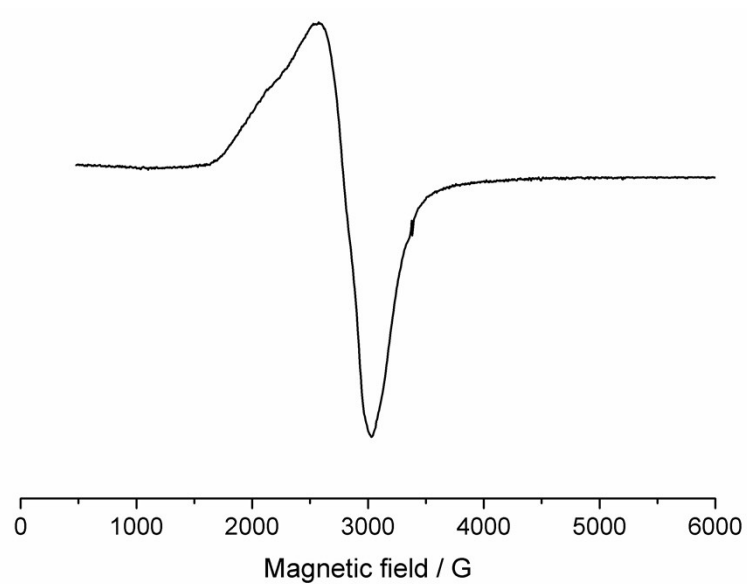

**Figure S1.** EPR spectra of polycrystalline sample of compound **4** at 77K ( $g = 2.430$ ).

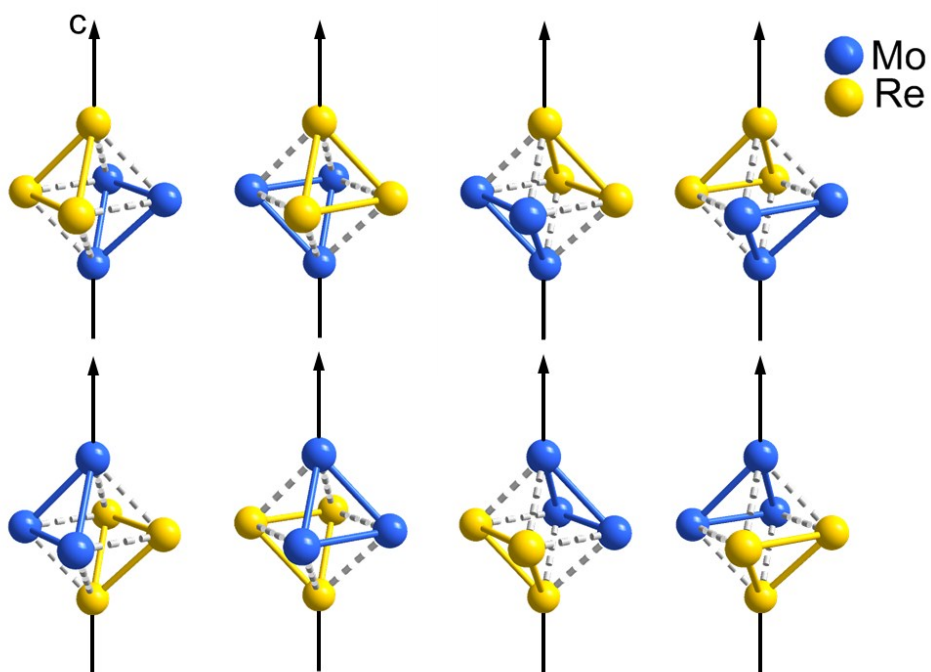

**Figure S2.** The possible orientations of *fac*-{Re<sub>3</sub>Mo<sub>3</sub>} isomer toward the fourfold axis in the crystal structure of compound **1**.

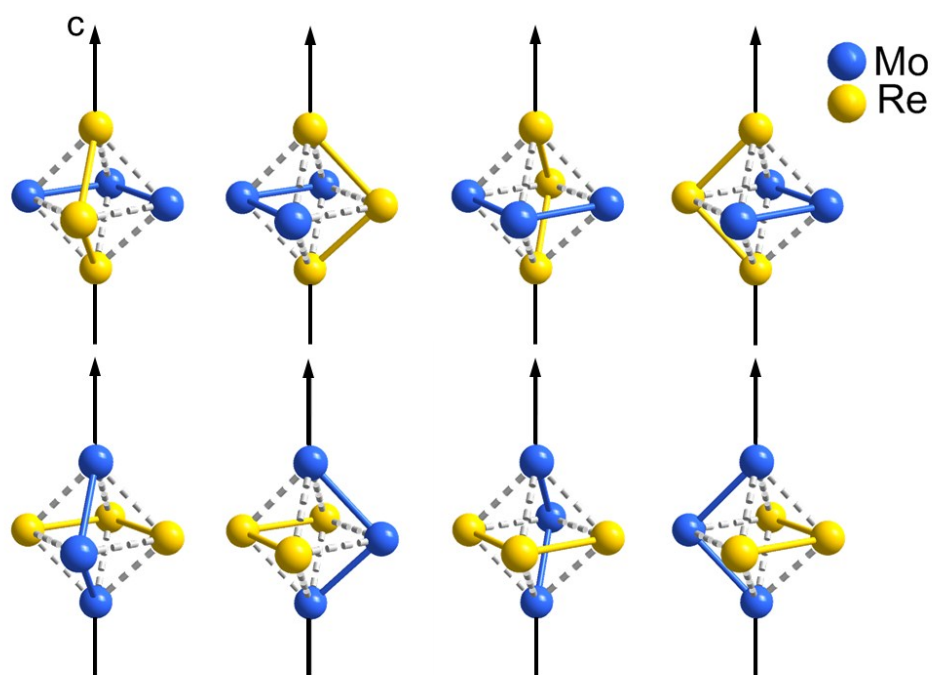

**Figure S3.** The possible orientations of  $mer\text{-}\{\text{Re}_3\text{Mo}_3\}$  isomer toward the fourfold axis in the crystal structure of compound **1**.

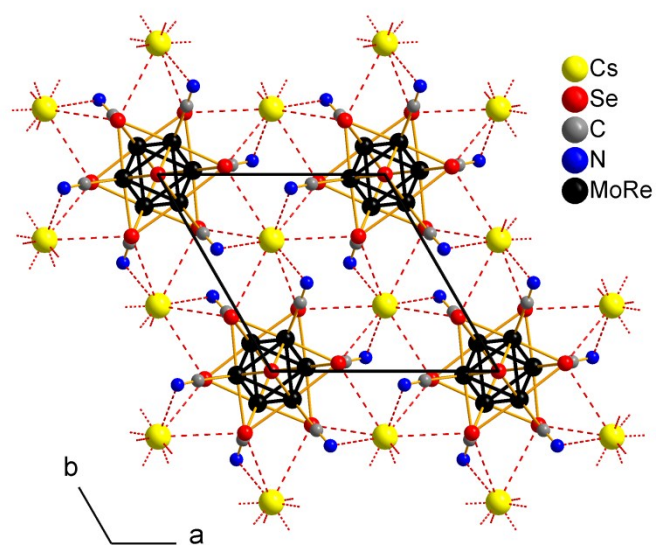

**Figure S4.** Fragment of crystal packing in **3**. Extra framework cations and solvate  $\text{H}_2\text{O}$  molecules are omitted for clarity.

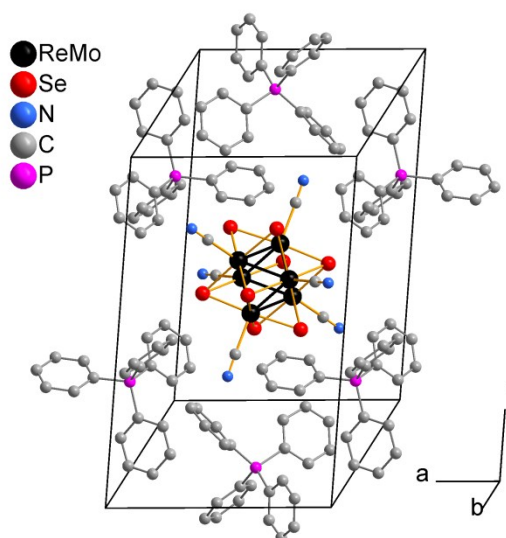

**Figure S5.** Fragment of crystal packing in **4**. Hydrogen atoms and solvate  $\text{CH}_3\text{CN}$  molecules are omitted for clarity.

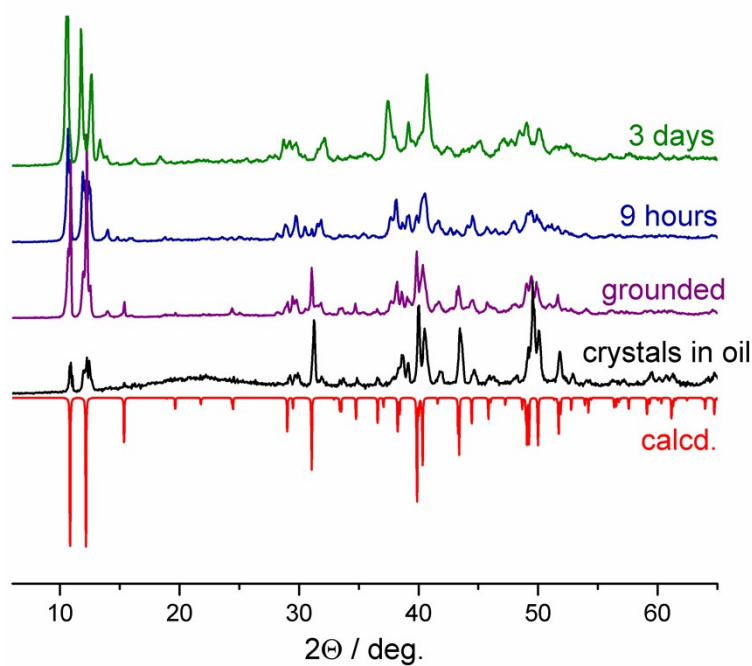

**Figure S6.** Powder XRD patterns for compound **1**. Down up: calculated pattern (red line); freshly prepared sample of **1** grounded in mineral oil (black line); freshly prepared sample of **1** grounded in  $\text{CCl}_4$  (purple line); the sample **1** grounded in  $\text{CCl}_4$  and exposed in air for 9 hours (blue line); the sample **1** grounded in  $\text{CCl}_4$  and exposed in air for 3 days (green line).

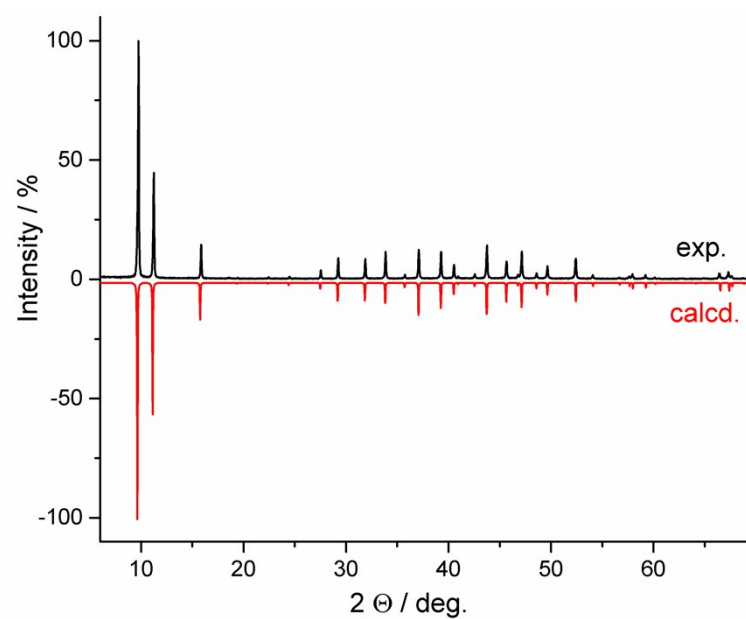

**Figure S7.** Powder XRD patterns (recorded, black vs calculated, red) for compound **2**.

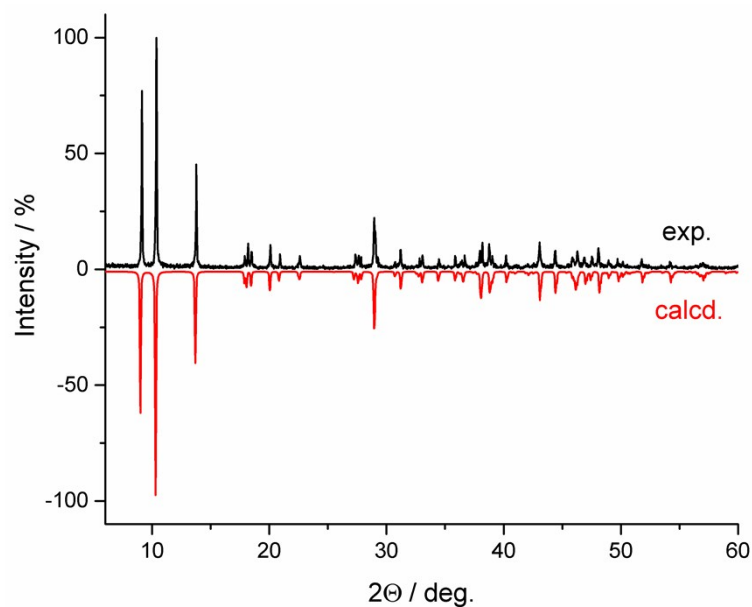

**Figure S8.** Powder XRD patterns (recorded, black vs calculated, red) for compound **3**.

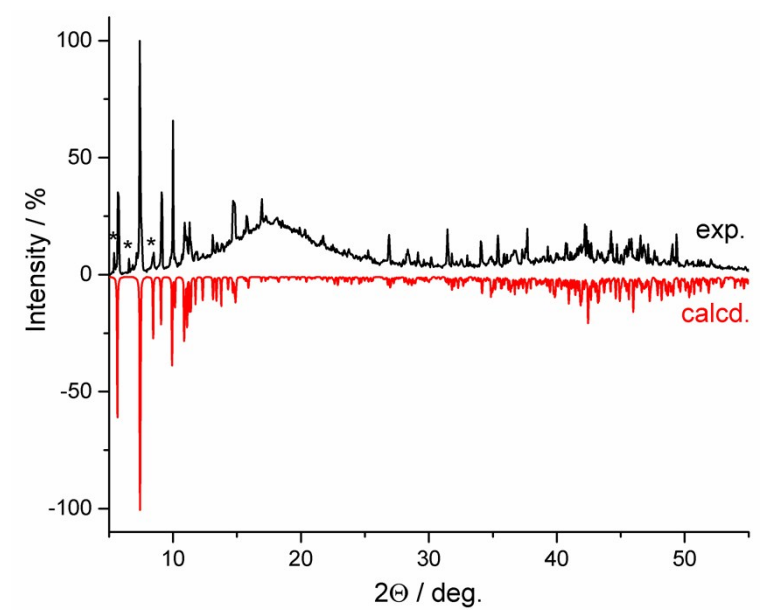

**Figure S9.** Powder XRD patterns (recorded, black vs calculated, red) for compound **4** in mineral oil. The asterisks mark the crystalline products of desolvation.
